# Supplementary material for: Syntheses and cytotoxicity of phosphatidylcholines containing ibuprofen or naproxen moieties
Source: PubMed Central journal article supplement (PMC6338774; doi:10.1038/s41598-018-36571-1), 2019-01-18
Supplement: 41598_2018_36571_MOESM1_ESM.pdf [file 41598_2018_36571_MOESM1_ESM.pdf]

## Supporting Information

### Syntheses and cytotoxicity of phosphatidylcholines containing ibuprofen or naproxen moieties

Marek Kłobucki<sup>a</sup>, Anna Urbaniak<sup>b</sup>, Aleksandra Grudniewska<sup>a</sup>, Bartłomiej Kocbach<sup>b</sup>, Gabriela Maciejewska<sup>c</sup>, Grzegorz Kielbowicz<sup>a</sup>, Maciej Ugorski<sup>b,d</sup>, Czesław Wawrzenczyk<sup>a,\*</sup>

<sup>a</sup> Department of Chemistry, Wrocław University of Environmental and Life Sciences, Norwida 25, 50-375 Wrocław, Poland

<sup>b</sup> Laboratory of Glycobiology, Ludwik Hirszfeld Institute of Immunology and Experimental Therapy, Polish Academy of Sciences, Weigla 12, 53-114 Wrocław, Poland

<sup>c</sup> Faculty of Chemistry, Wrocław University of Science and Technology, Wybrzeże Wyspiańskiego 27, 50-370 Wrocław, Poland

<sup>d</sup> Department of Biochemistry and Molecular Biology, Wrocław University of Environmental and Life Sciences, Norwida 31, 50-375 Wrocław, Poland

\* Corresponding author. Email address: [czeslaw.wawrzenczyk@upwr.edu.pl](mailto:czeslaw.wawrzenczyk@upwr.edu.pl)

| Content                                                                    | Page  |
|----------------------------------------------------------------------------|-------|
| <sup>1</sup> H and <sup>13</sup> C NMR spectra of <b>7</b> (Fig. S1-S2)    | 2-3   |
| <sup>1</sup> H and <sup>13</sup> C NMR spectra of <b>8</b> (Fig. S3-S4)    | 4-5   |
| <sup>1</sup> H and <sup>13</sup> C NMR spectra of <b>9</b> (Fig. S5-S6)    | 6-7   |
| <sup>1</sup> H and <sup>13</sup> C NMR spectra of <b>10</b> (Fig. S7-S8)   | 8-9   |
| <sup>1</sup> H and <sup>13</sup> C NMR spectra of <b>12</b> (Fig. S9-S10)  | 10-11 |
| <sup>1</sup> H and <sup>13</sup> C NMR spectra of <b>13</b> (Fig. S11-S12) | 12-13 |
| <sup>1</sup> H and <sup>13</sup> C NMR spectra of <b>15</b> (Fig. S13-S14) | 14-15 |
| <sup>1</sup> H and <sup>13</sup> C NMR spectra of <b>16</b> (Fig. S15-S16) | 16-17 |

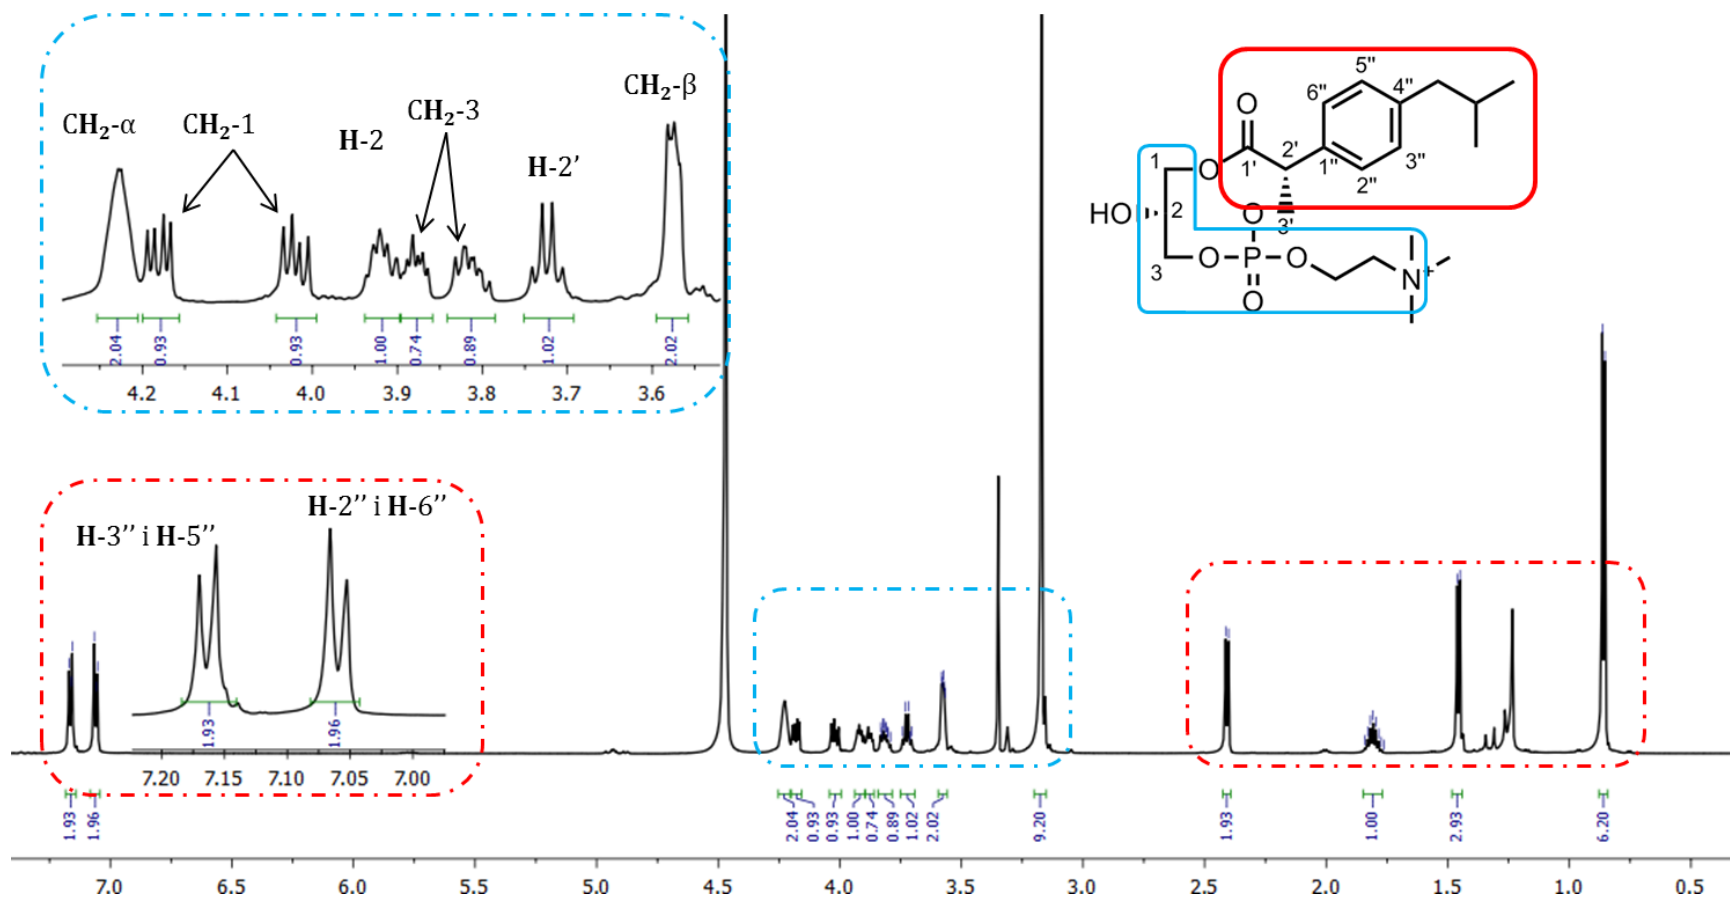

Figure S1. <sup>1</sup>H NMR spectrum (600 MHz, CDCl<sub>3</sub>) of 7.

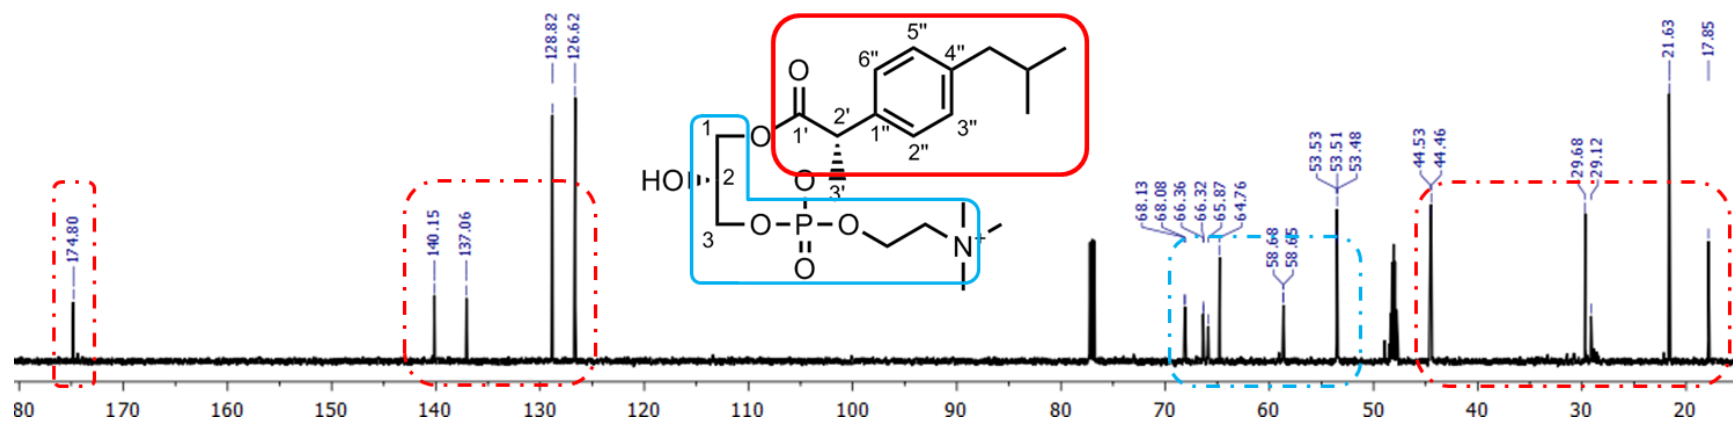

Figure S2.  $^{13}\text{C}$  NMR spectrum (150 MHz,  $\text{CDCl}_3$ ) of 7.

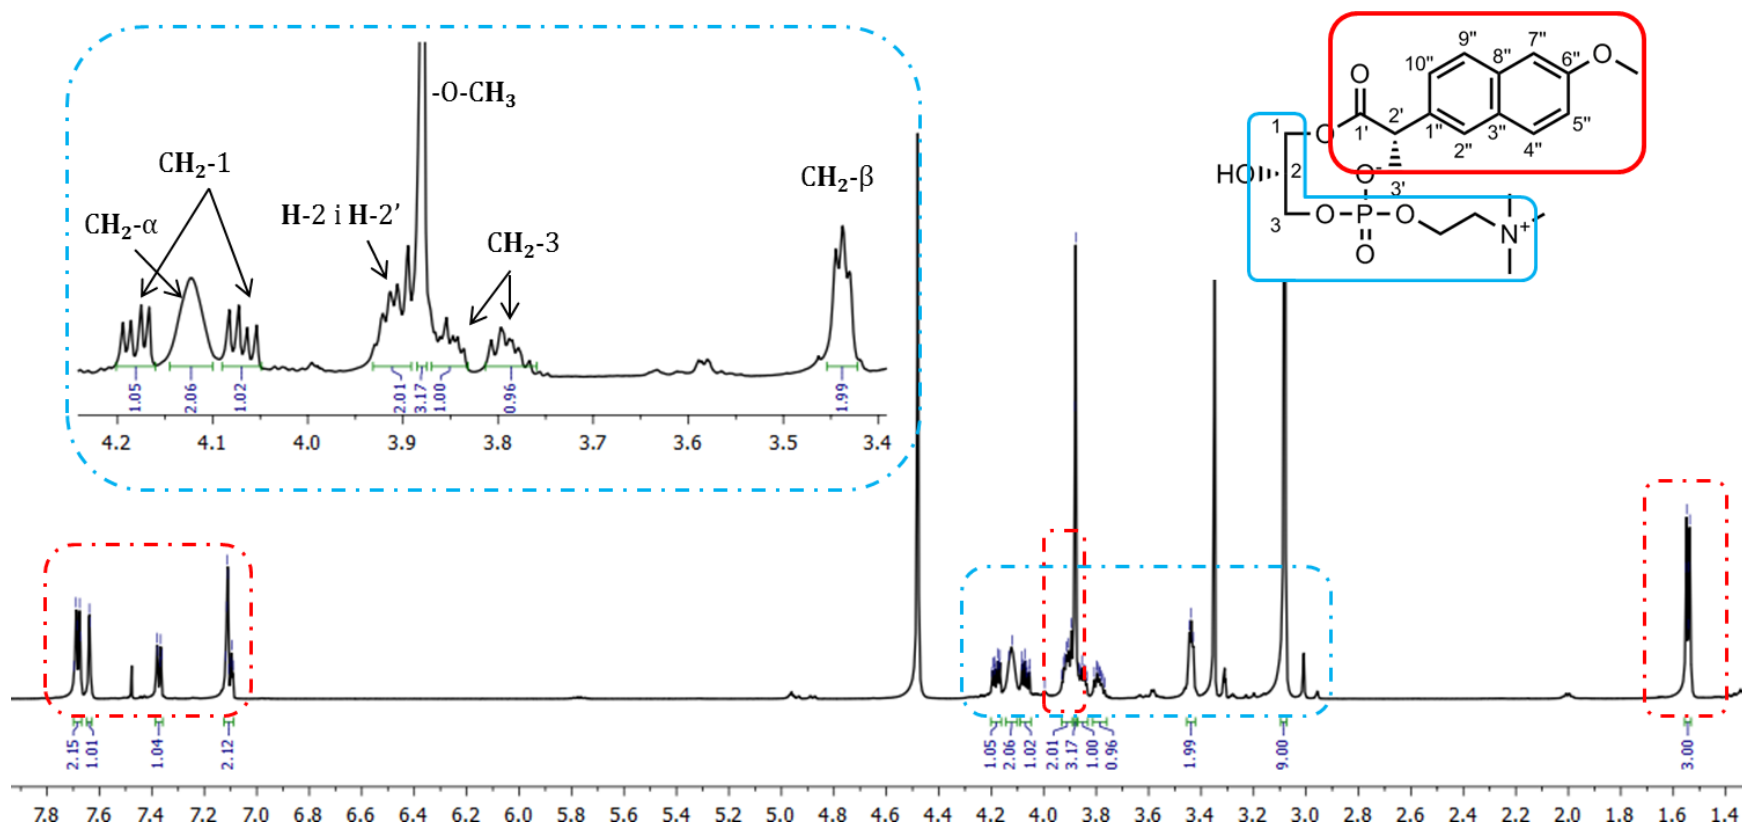

Figure S3.  $^1\text{H}$  NMR spectrum (600 MHz,  $\text{CDCl}_3$ ) of **8**.

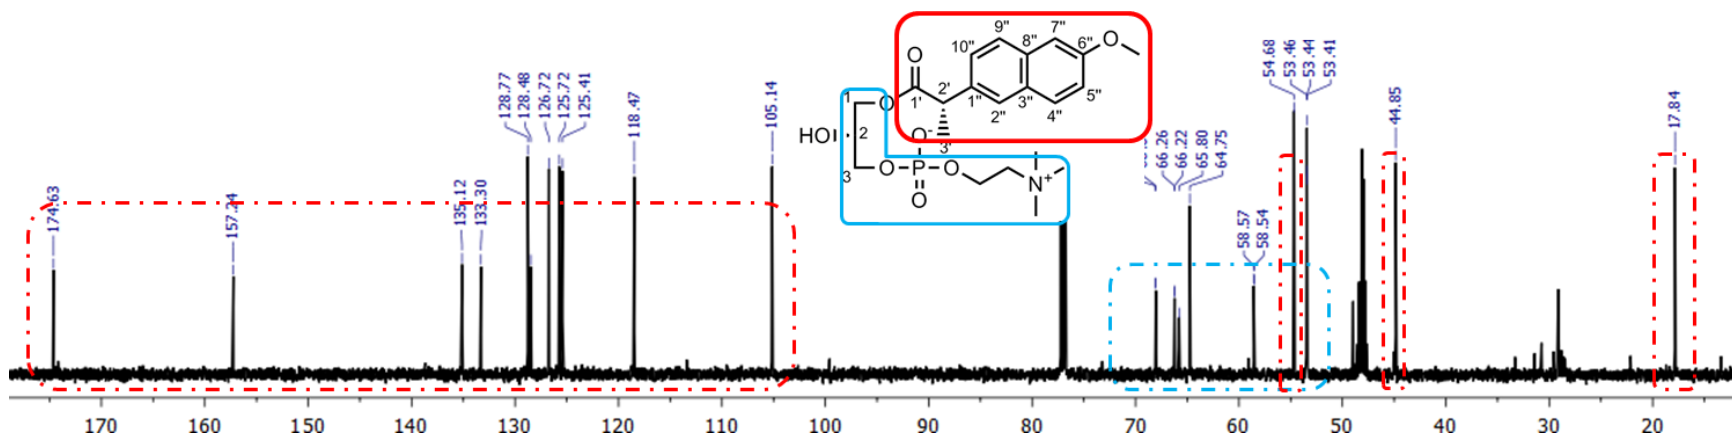

**Figure S4.**  $^{13}\text{C}$  NMR spectrum (600 MHz,  $\text{CDCl}_3:\text{CD}_3\text{OD}$ , 2:1, v/v) of **8**.

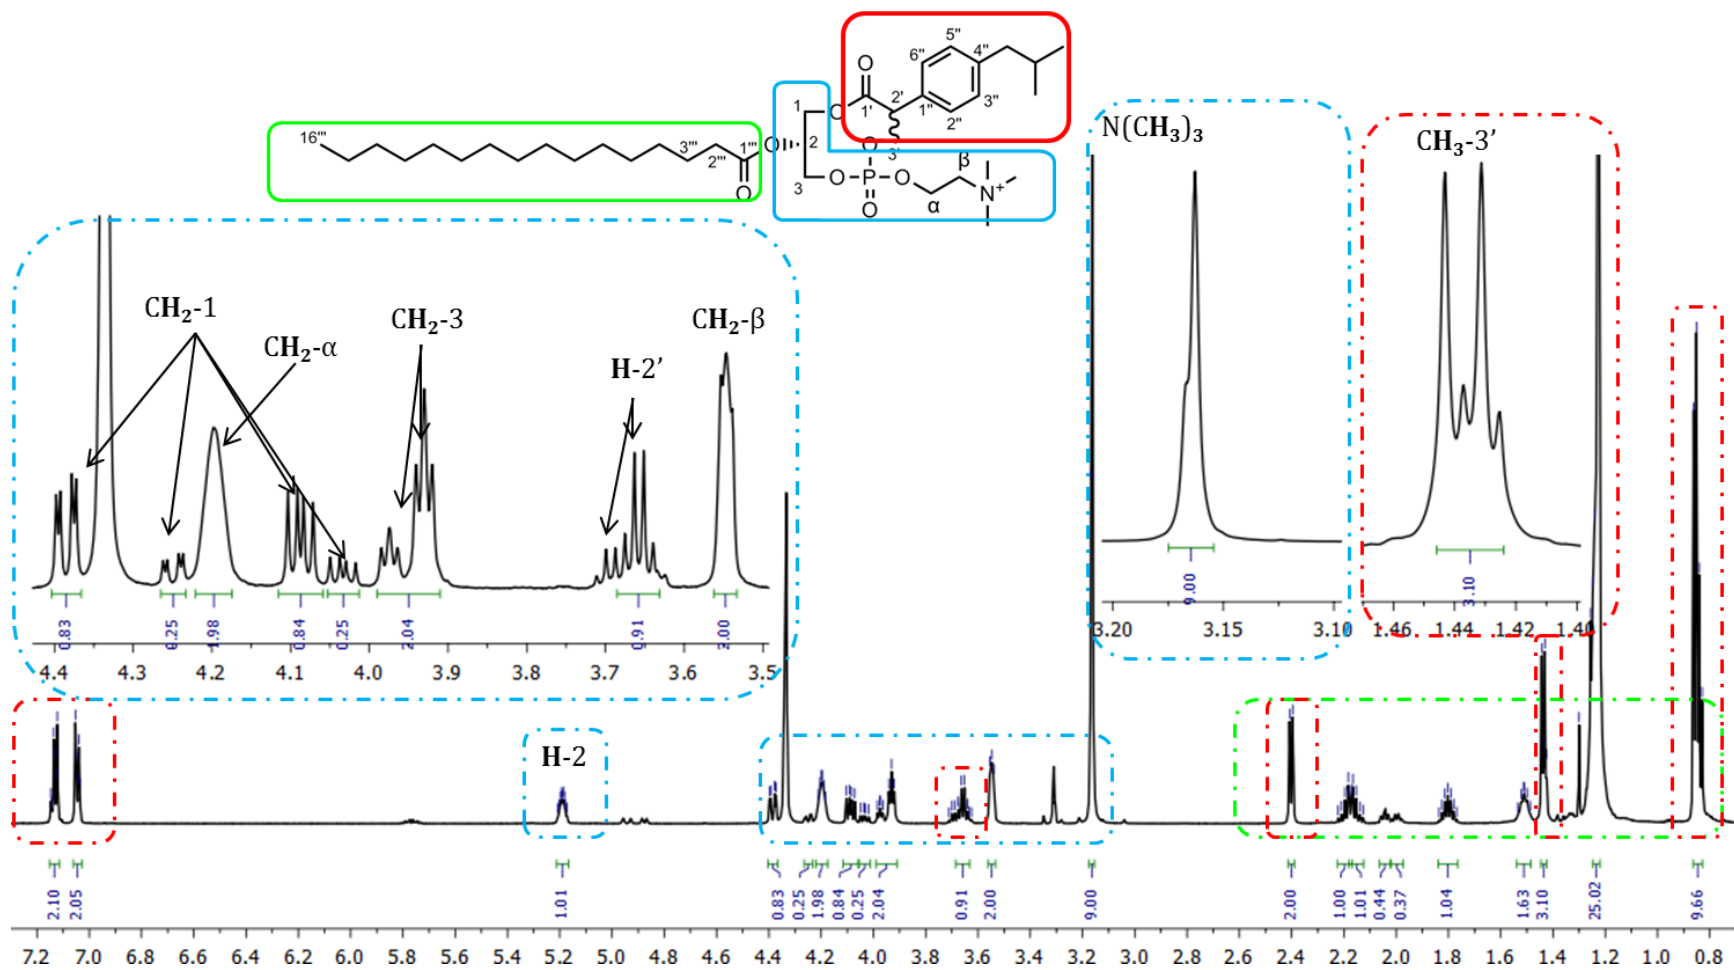

**Figure S5.**  $^1\text{H}$  NMR spectrum (600 MHz,  $\text{CDCl}_3:\text{CD}_3\text{OD}$ , 2:1, v/v) of **9**.

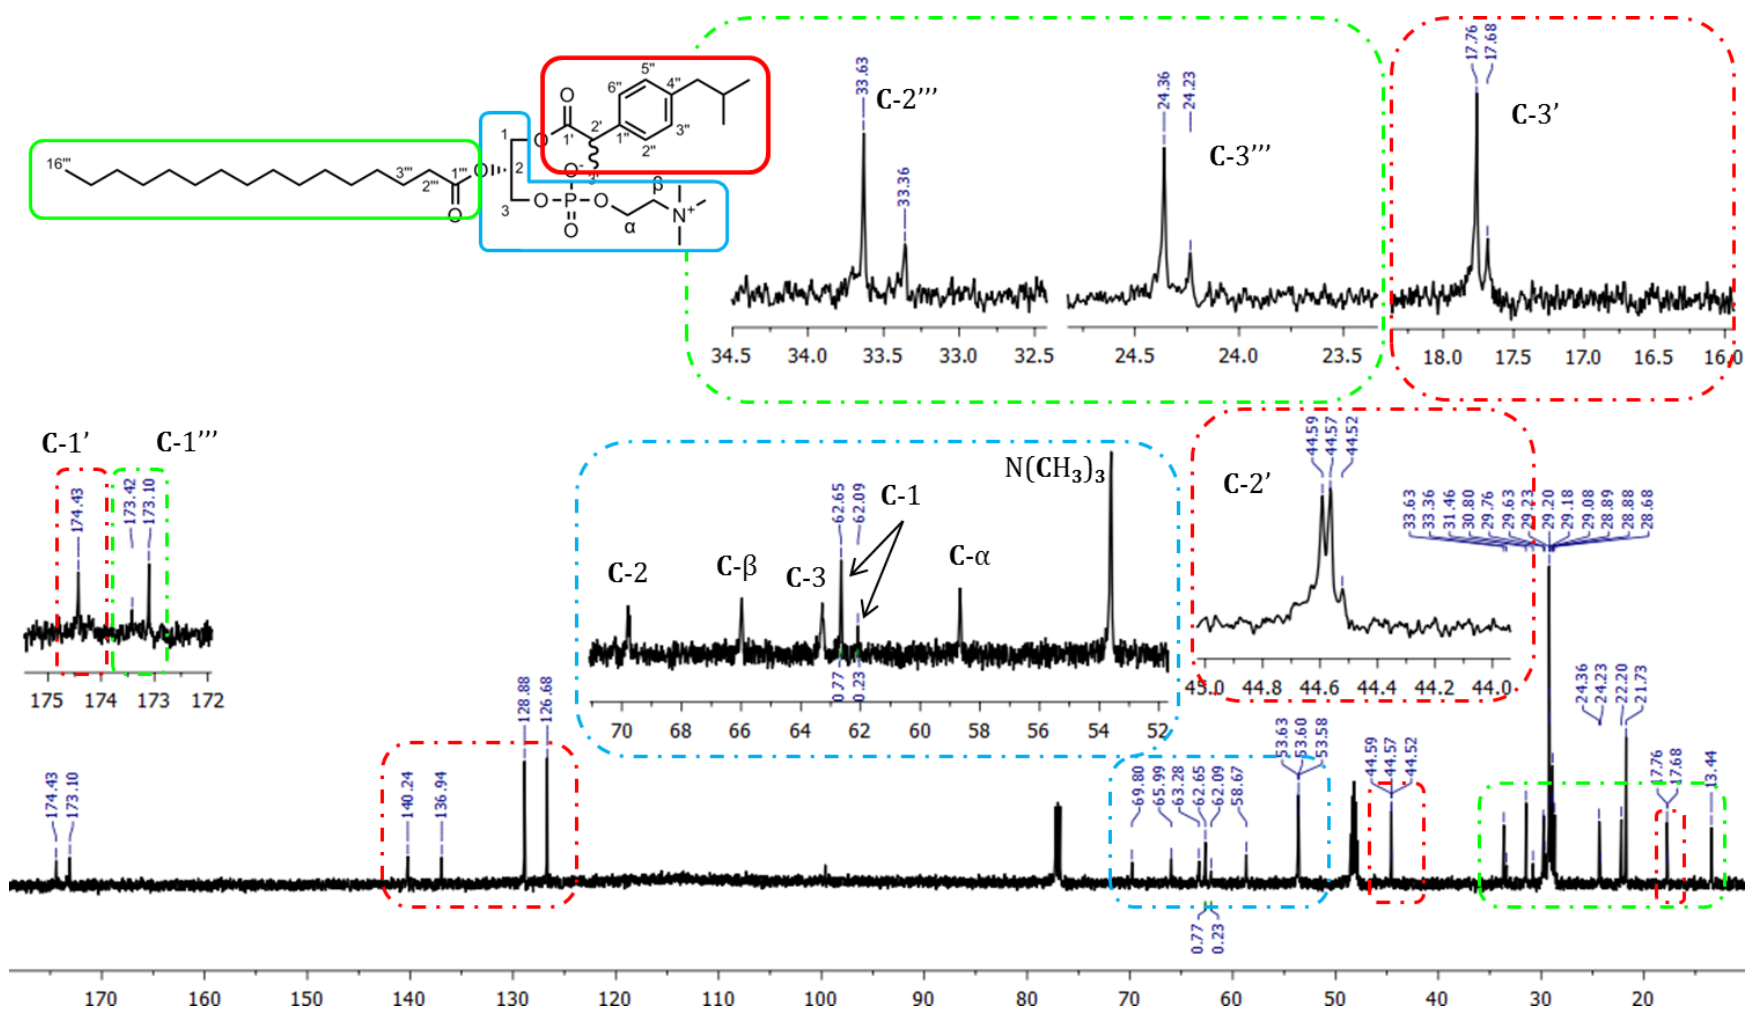

**Figure S6.**  $^{13}\text{C}$  NMR spectrum (150 MHz,  $\text{CDCl}_3:\text{CD}_3\text{OD}$ , 2:1, v/v) of **9**.

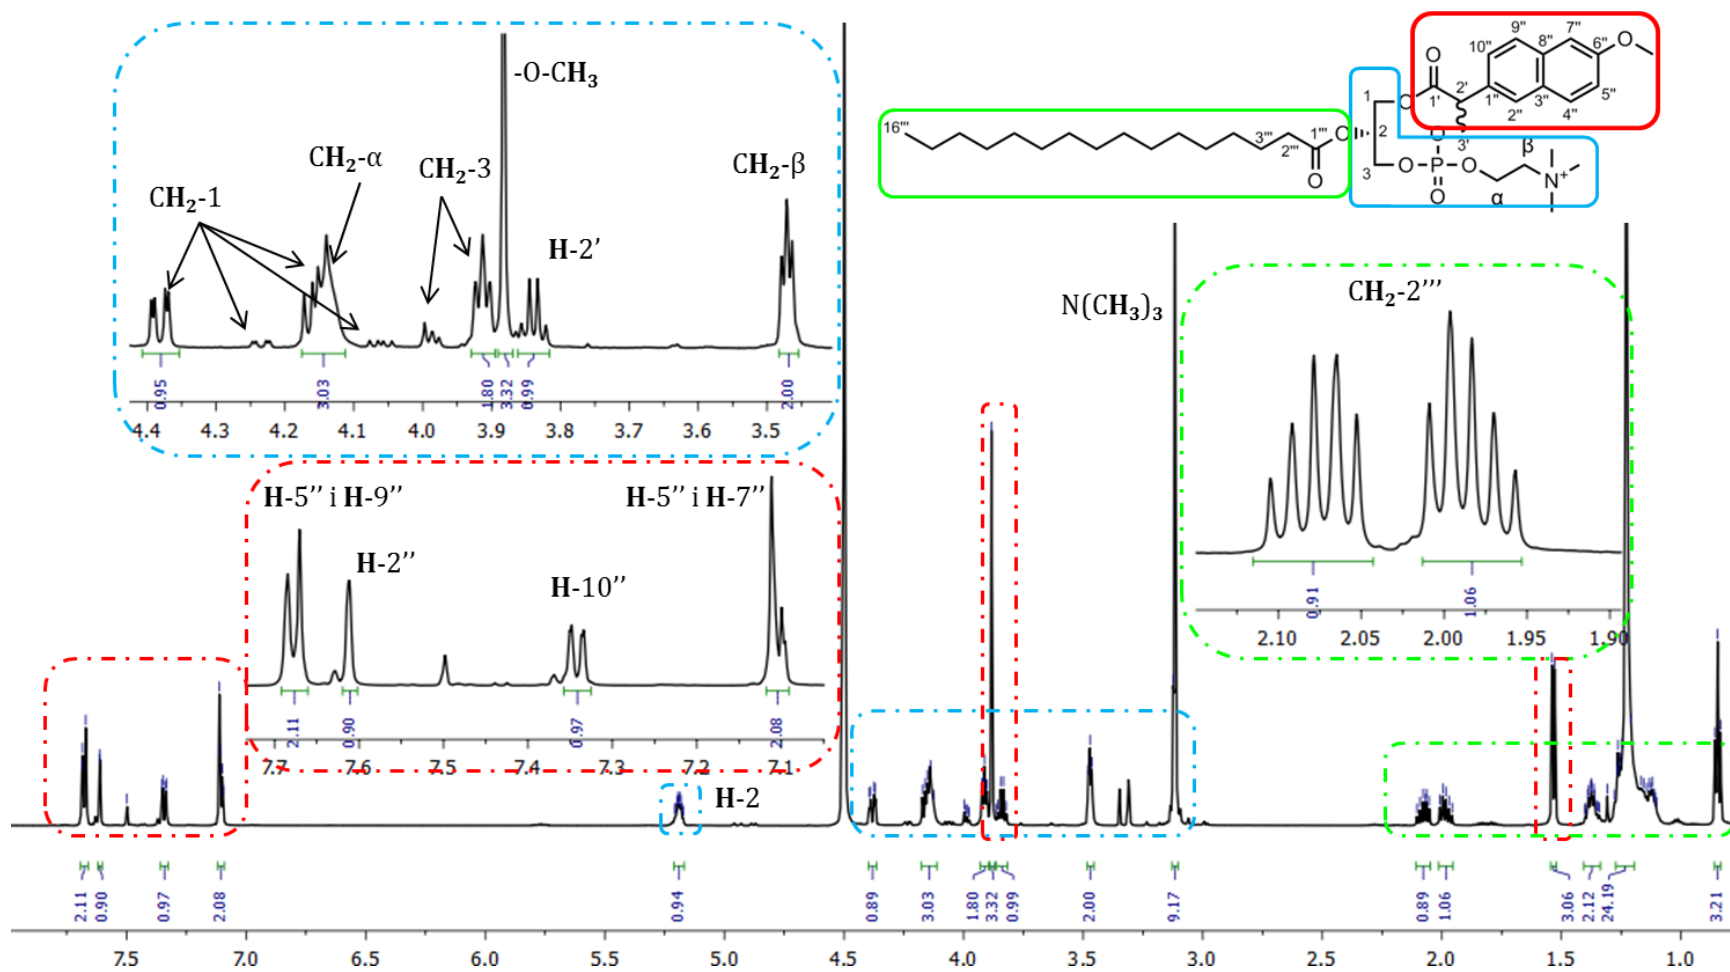

Figure S7. <sup>1</sup>H NMR spectrum (600 MHz, CDCl<sub>3</sub>:CD<sub>3</sub>OD, 2:1, v/v) of **10**.



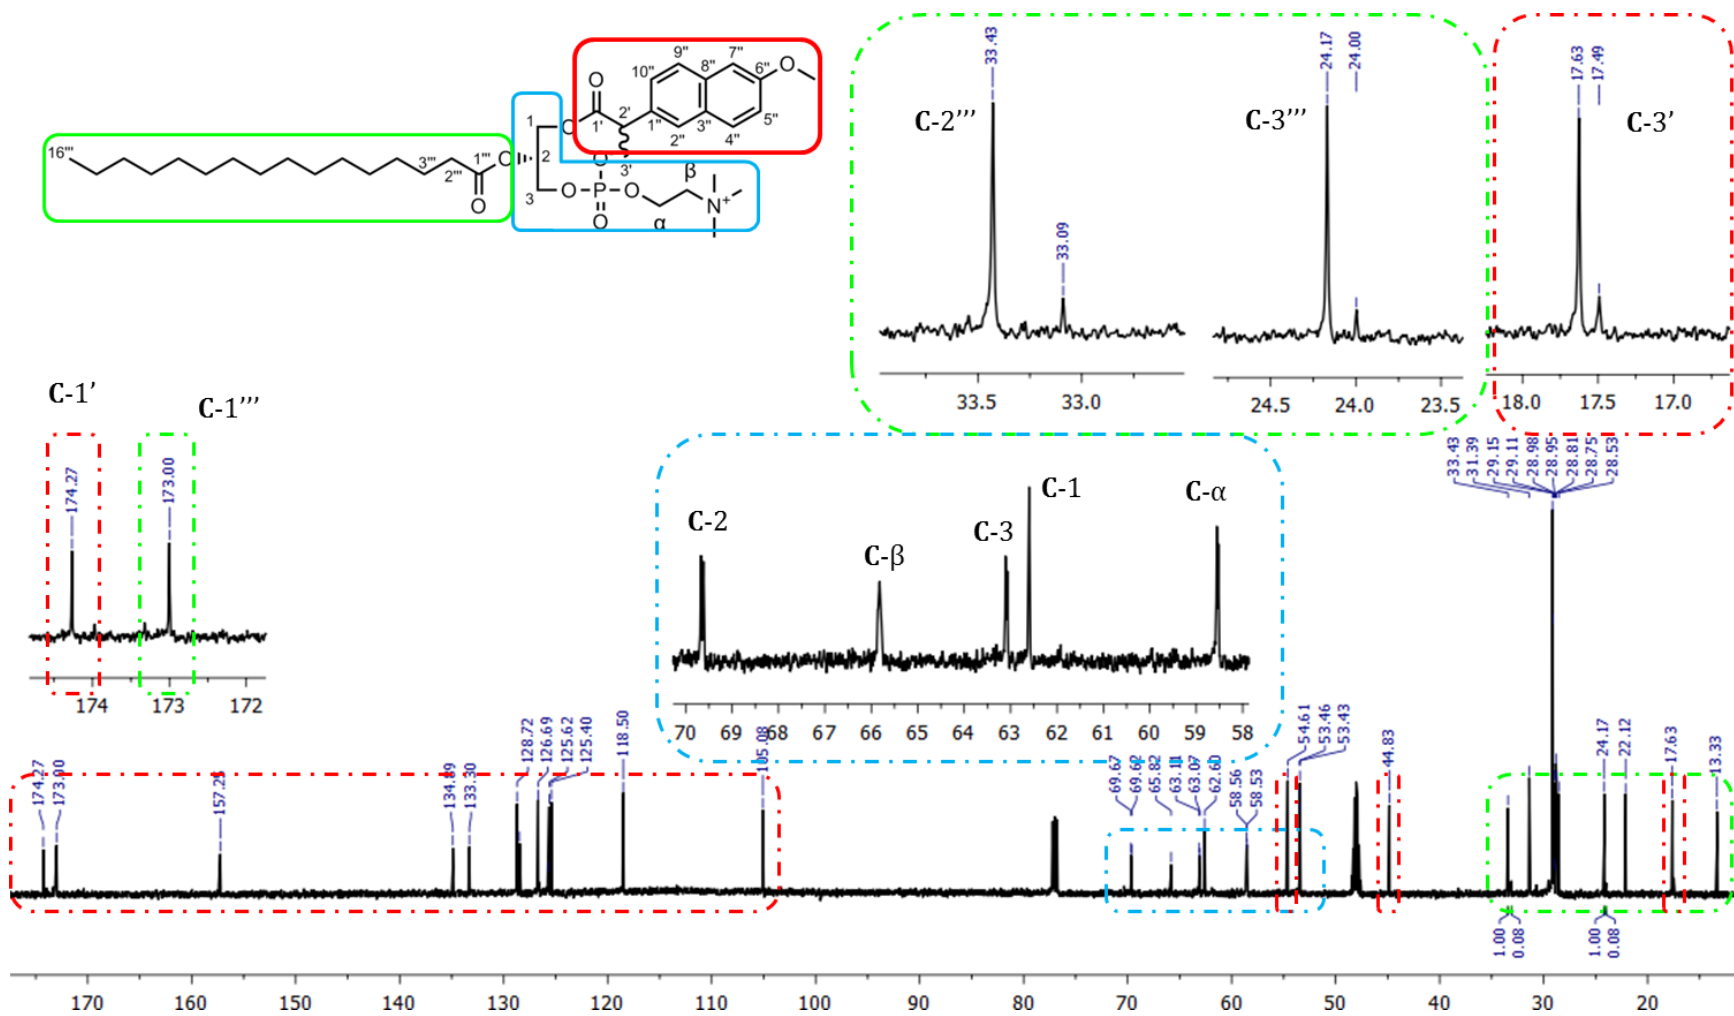

**Figure S8.**  $^{13}\text{C}$  NMR spectrum (150 MHz,  $\text{CDCl}_3:\text{CD}_3\text{OD}$ , 2:1, v/v) of **10**.

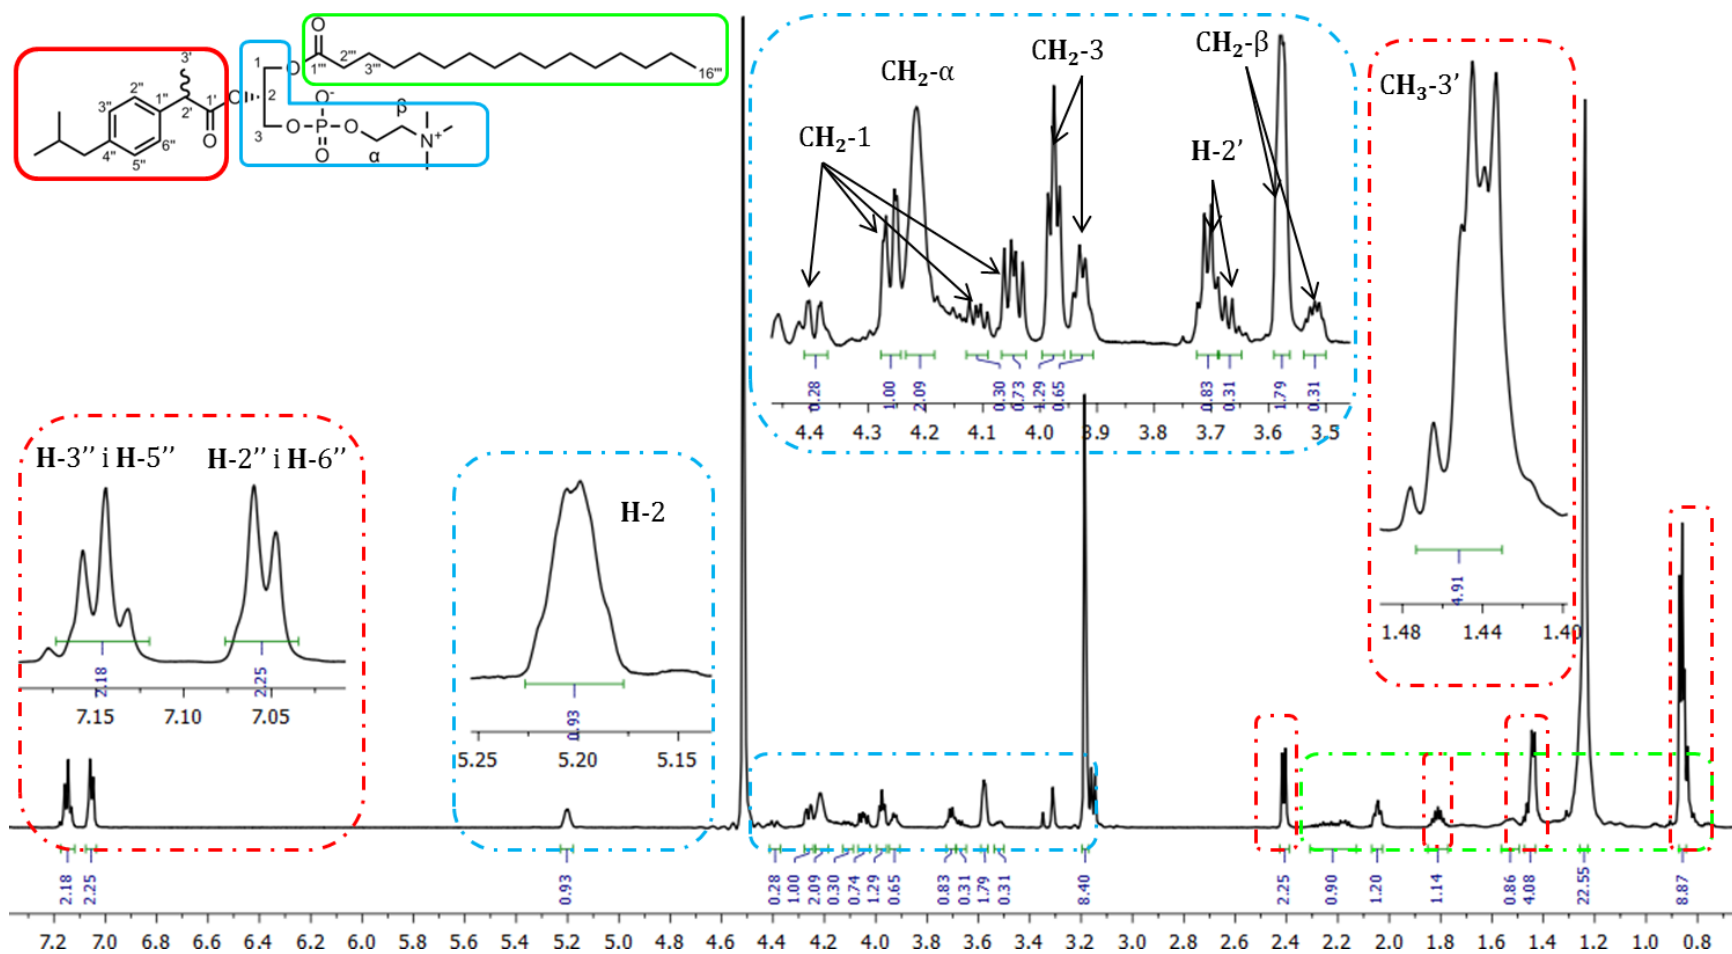

**Figure S9.** <sup>1</sup>H NMR spectrum (600 MHz, CDCl<sub>3</sub>:CD<sub>3</sub>OD, 2:1, v/v) of **12**.

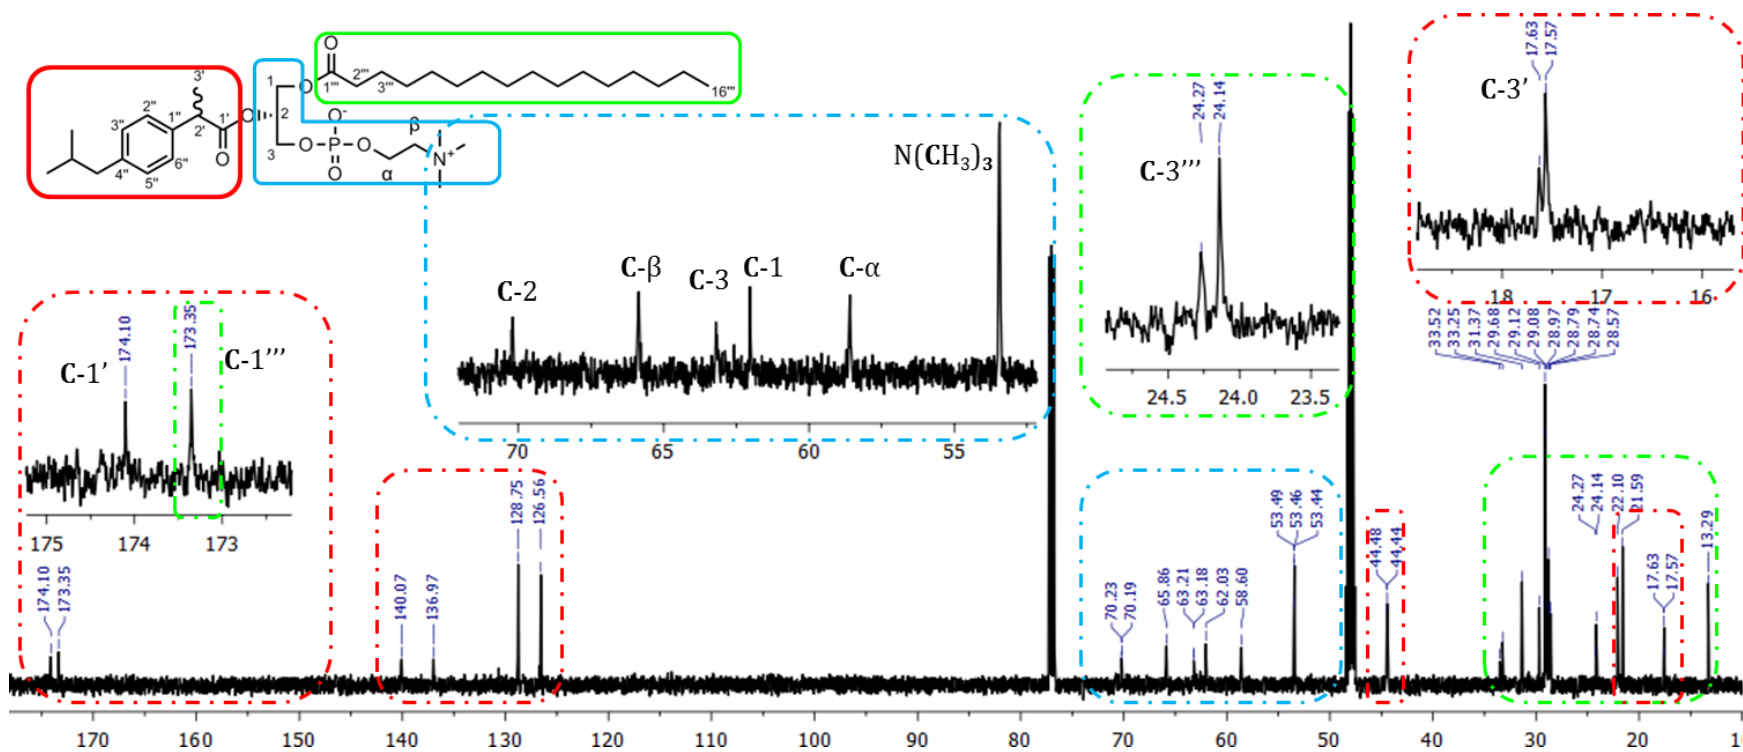

**Figure S10.** <sup>13</sup>C NMR spectrum (150 MHz, CDCl<sub>3</sub>:CD<sub>3</sub>OD, 2:1, v/v) of 12.

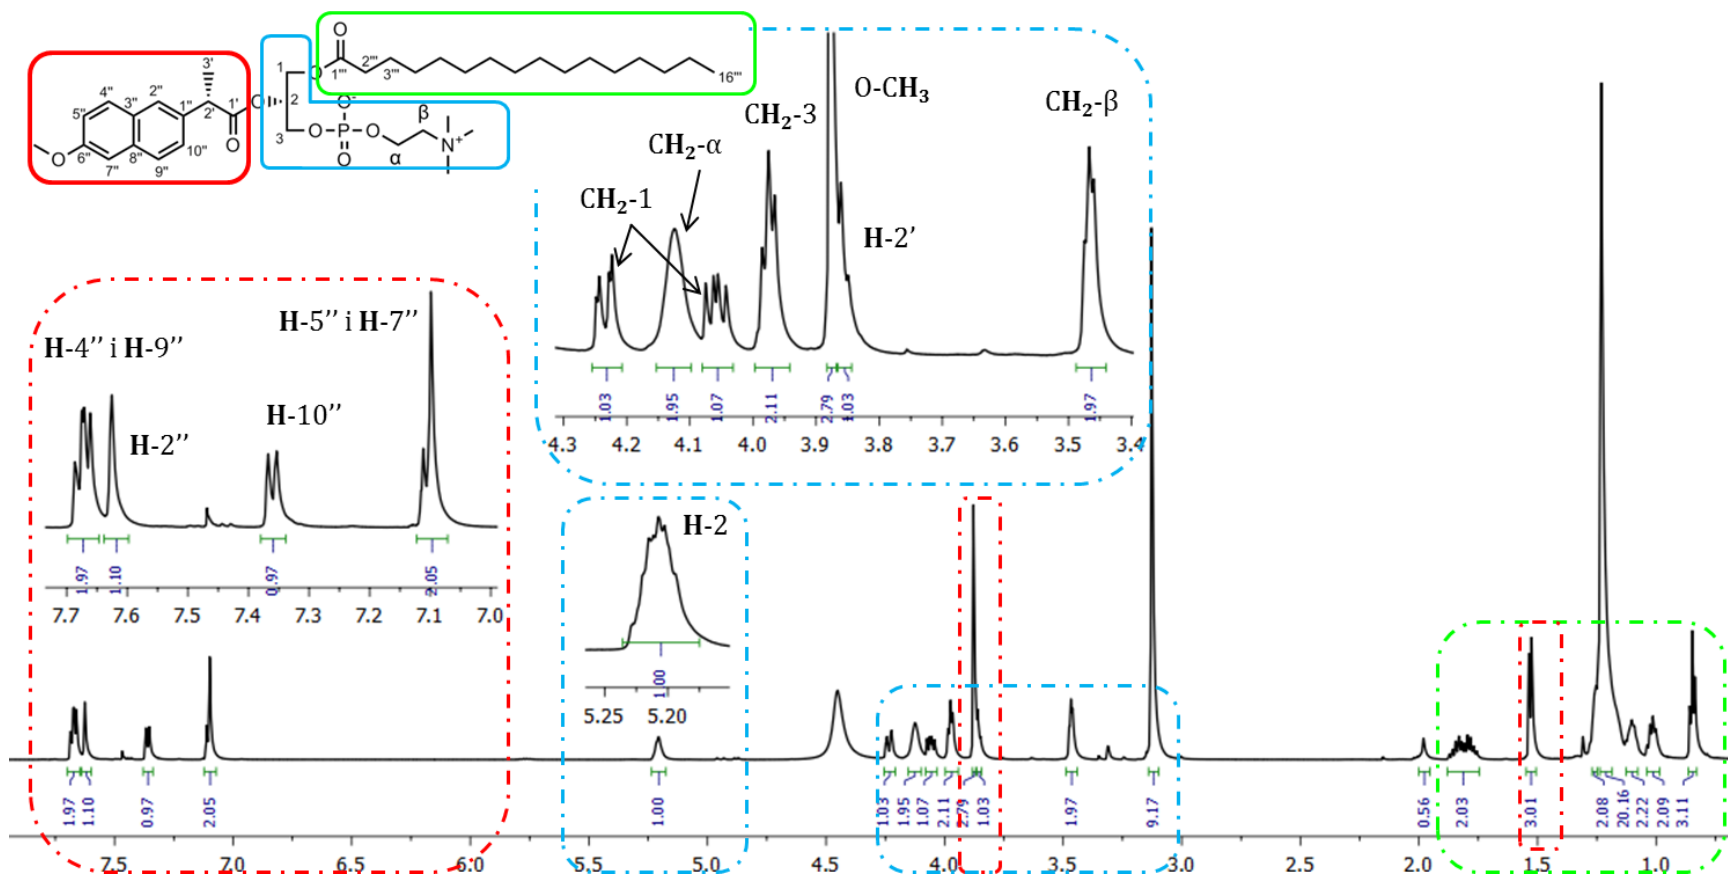

Figure S11. <sup>1</sup>H NMR spectrum (600 MHz, CDCl<sub>3</sub>:CD<sub>3</sub>OD, 2:1, v/v) of **13**.

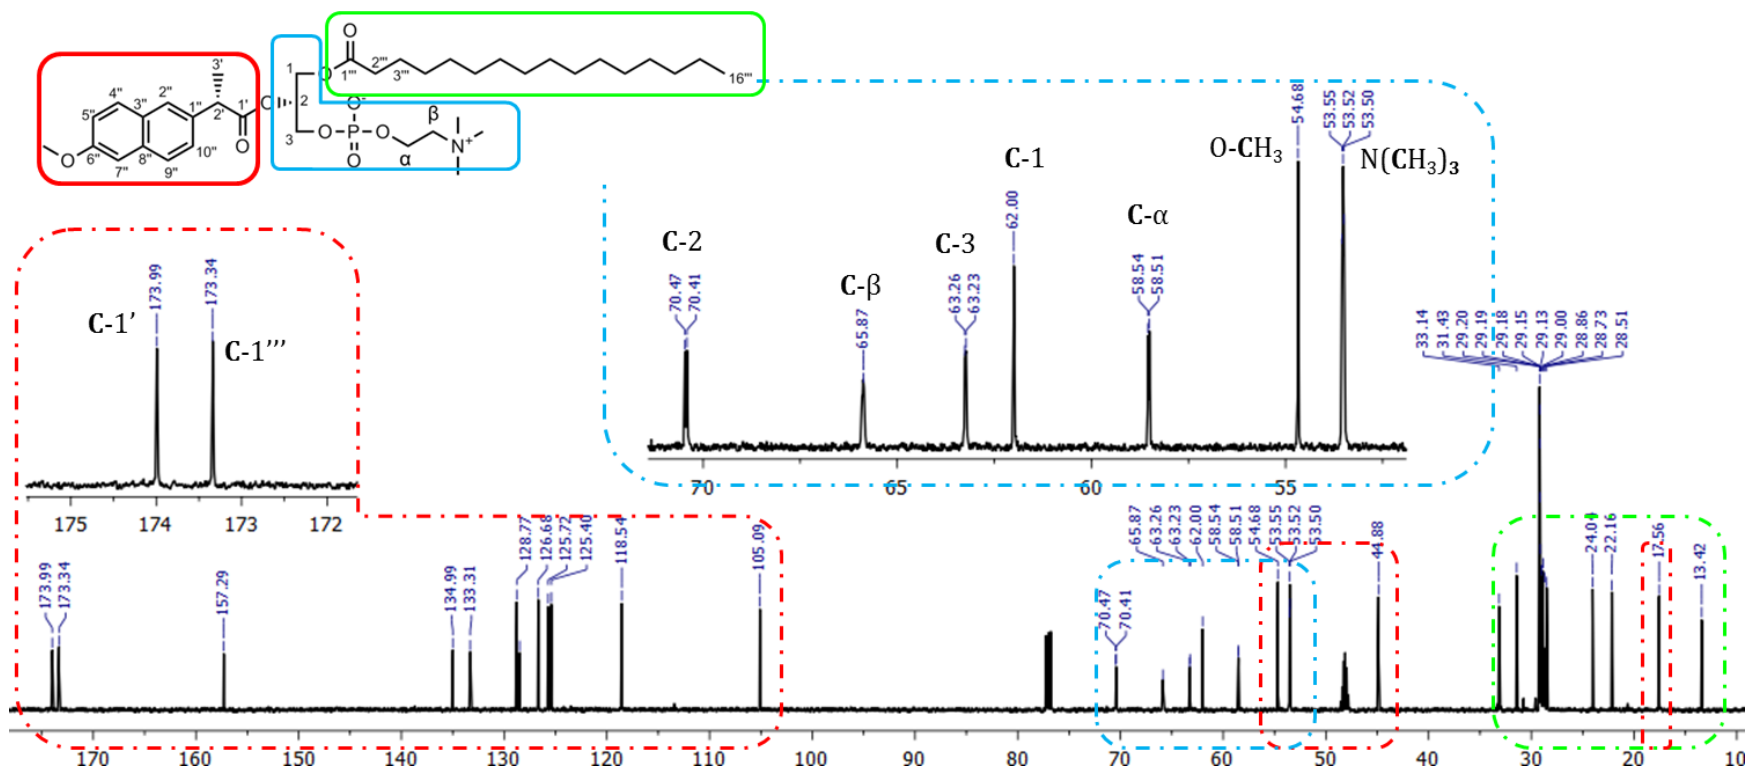

**Figure S12.** <sup>13</sup>C NMR spectrum (150 MHz, CDCl<sub>3</sub>:CD<sub>3</sub>OD, 2:1, v/v) of **13**.

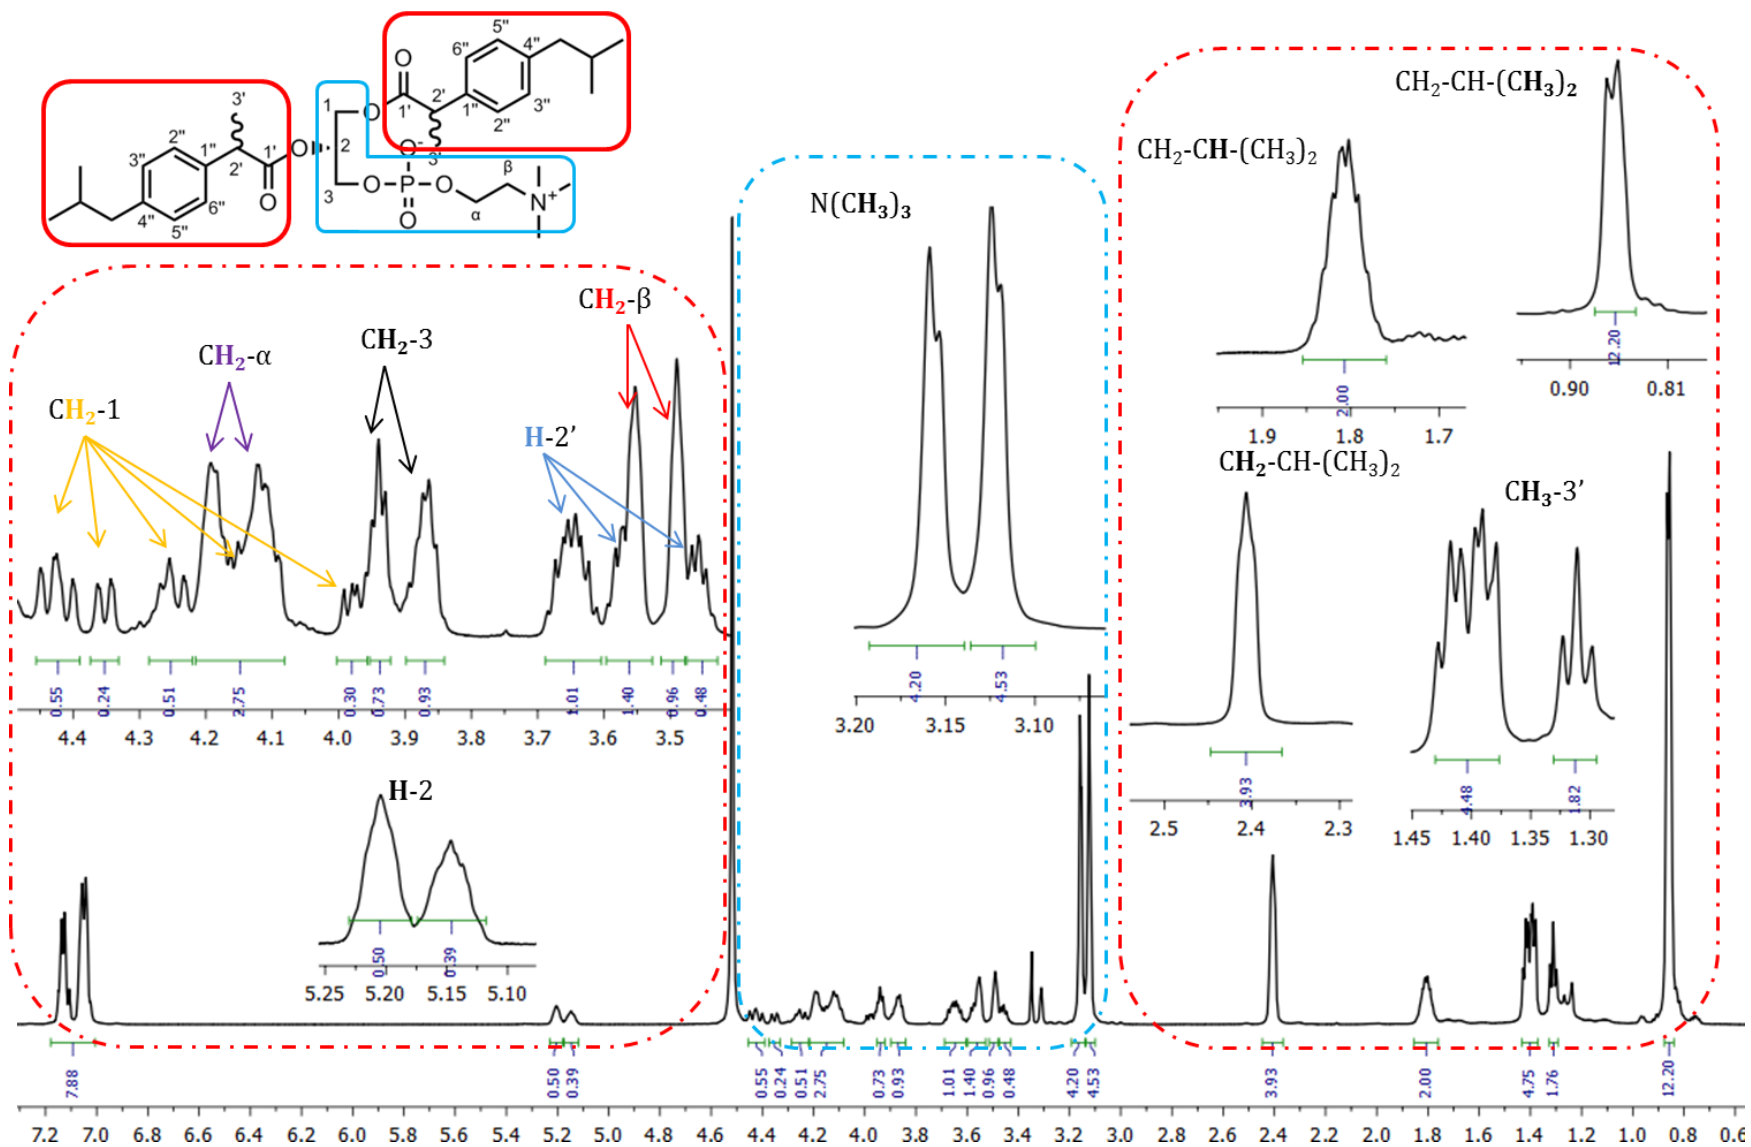

**Figure S13.** <sup>1</sup>H NMR spectrum (600 MHz, CDCl<sub>3</sub>:CD<sub>3</sub>OD, 2:1, v/v) of **15**.

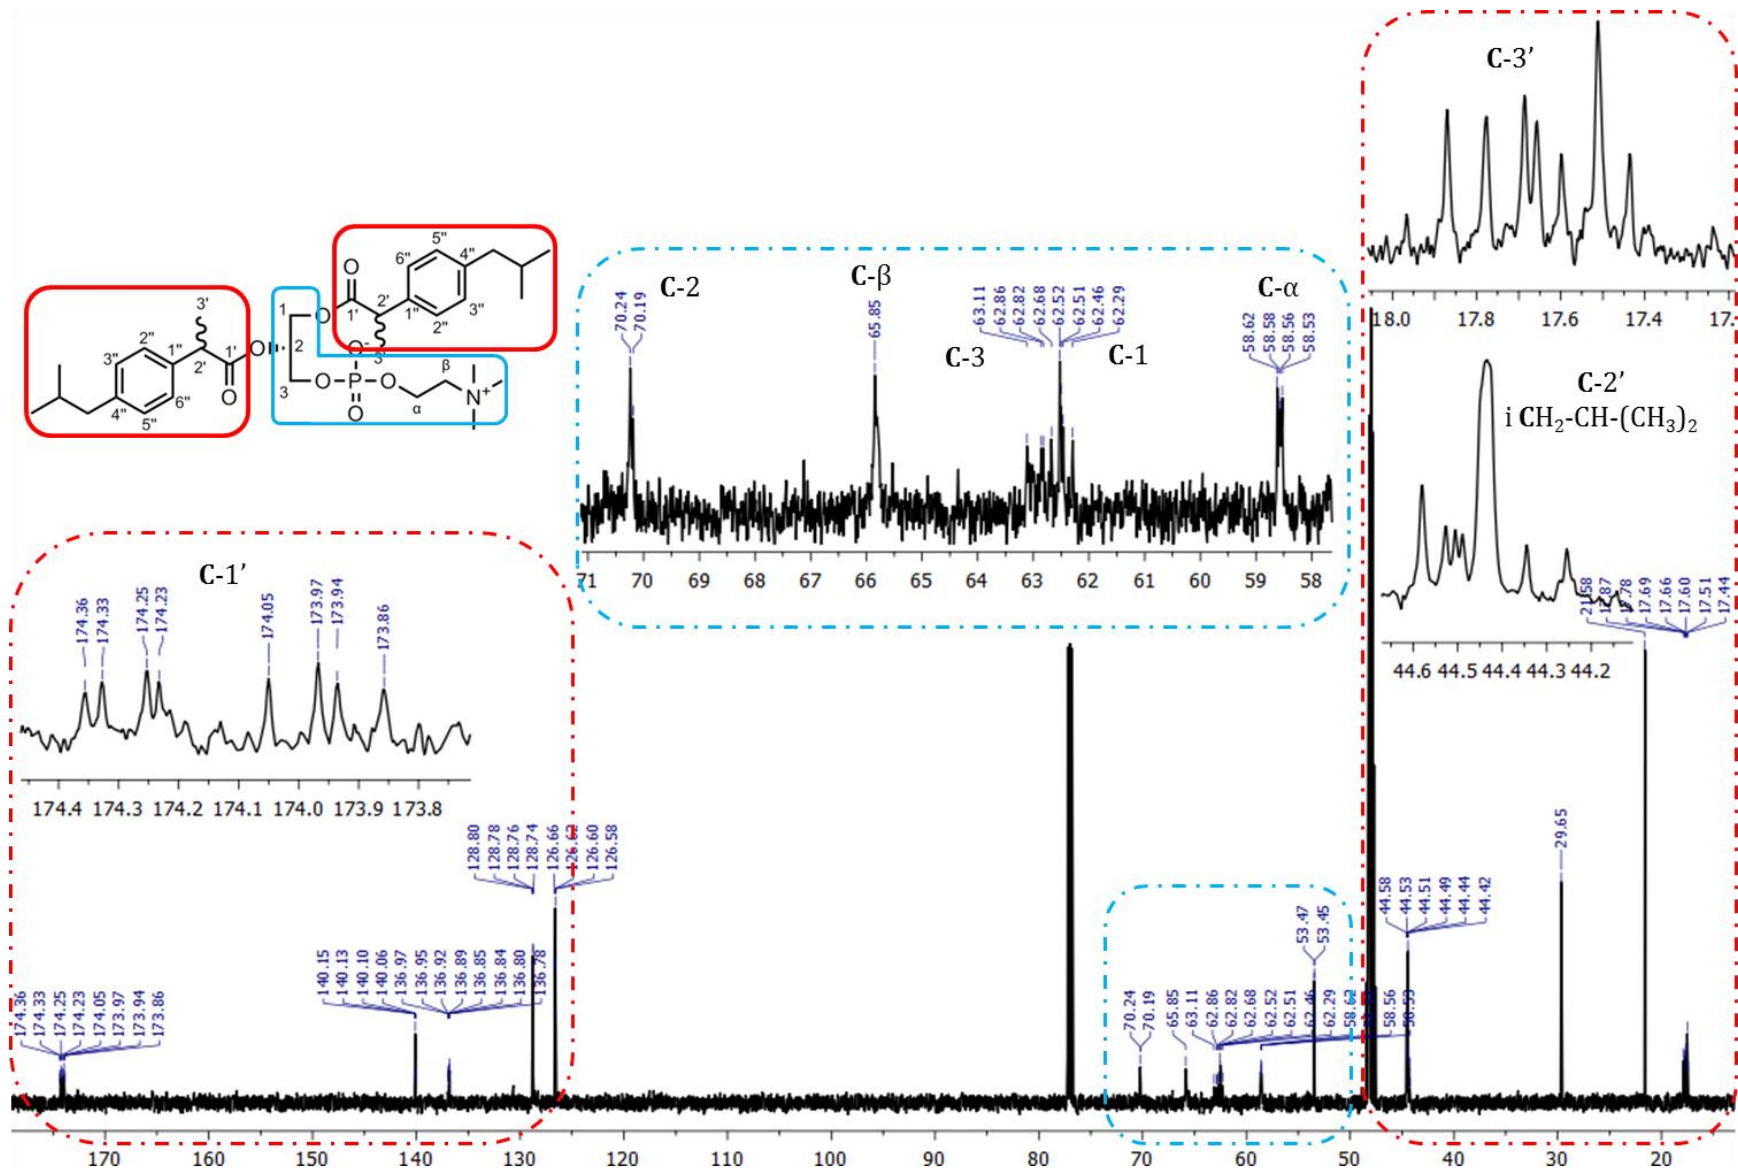

Figure S14. <sup>13</sup>C NMR spectrum (150 MHz, CDCl<sub>3</sub>:CD<sub>3</sub>OD, 2:1, v/v) of 15.

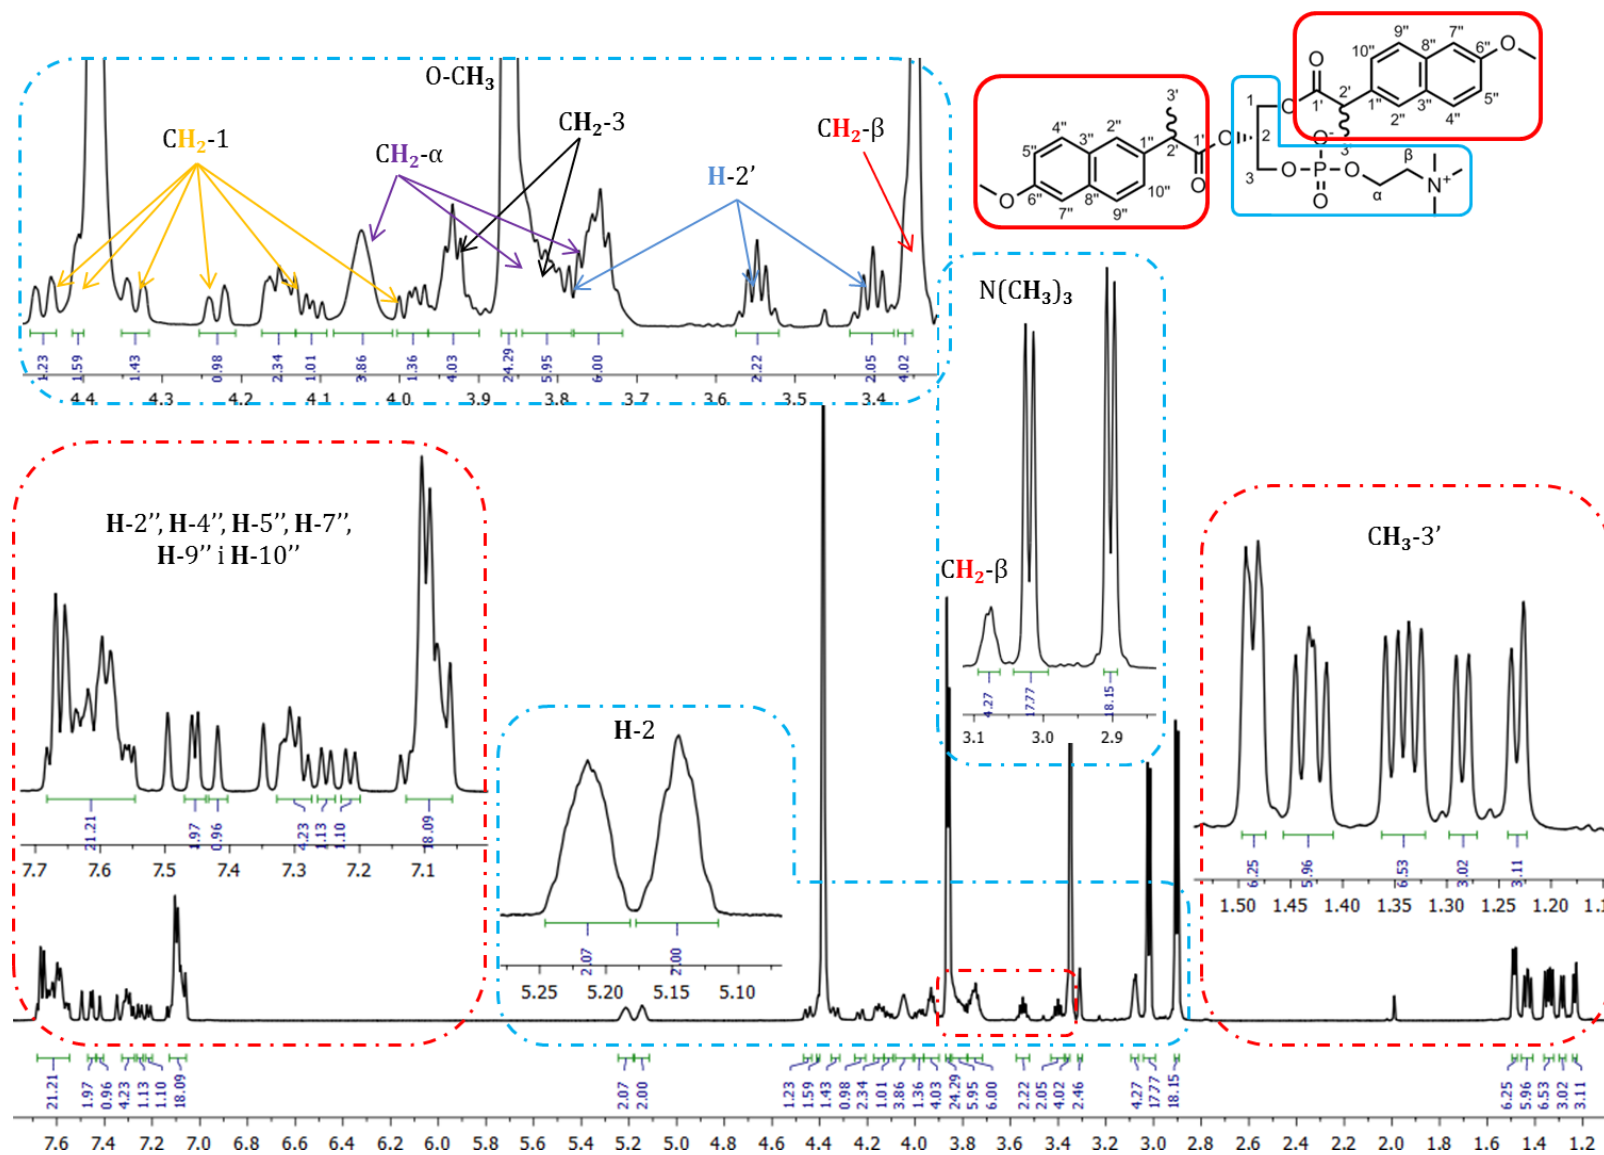

Figure S15.  $^1\text{H}$  NMR spectrum (600 MHz,  $\text{CDCl}_3$ : $\text{CD}_3\text{OD}$ , 2:1, v/v) of **16**.



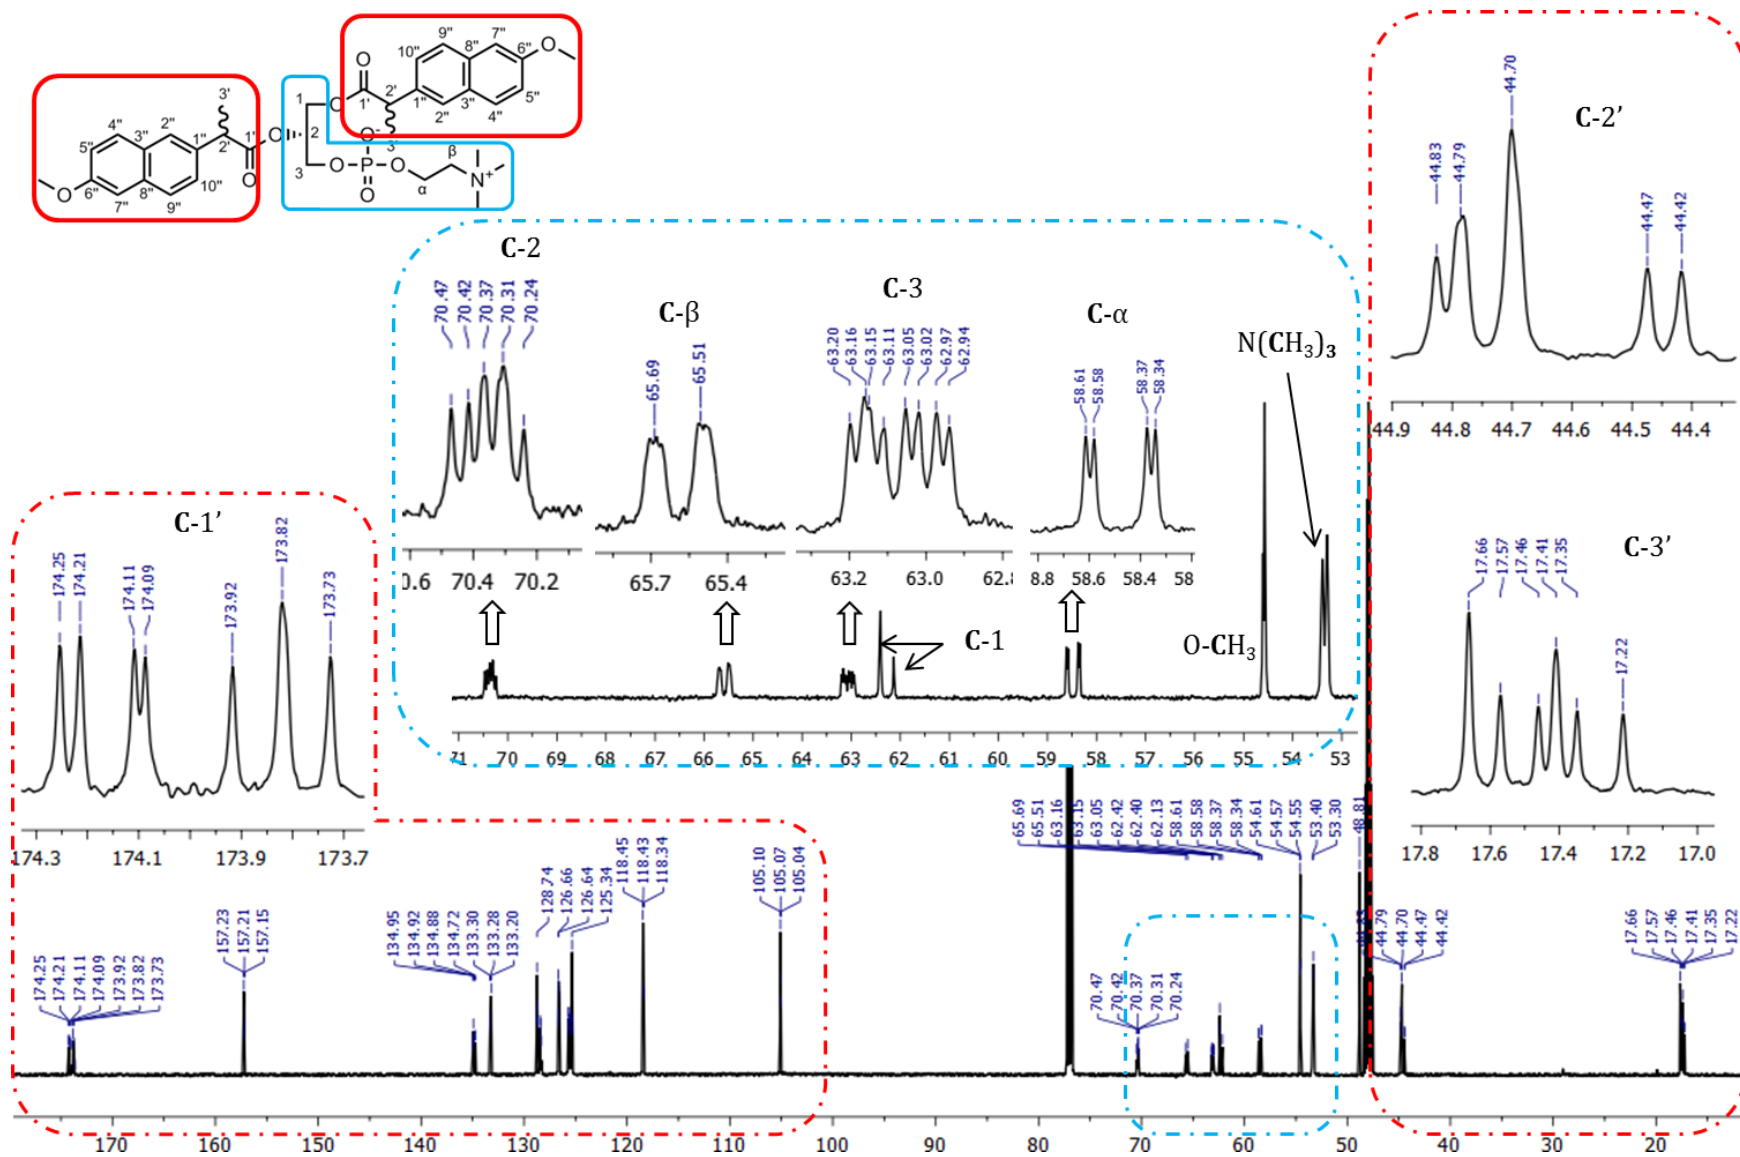

**Figure S16.** <sup>13</sup>C NMR spectrum (150 MHz, CDCl<sub>3</sub>:CD<sub>3</sub>OD, 2:1, v/v) of 16.
